# Supplementary material for: Mixed ligand system of cysteine and thioglycolic acid assisting in the synthesis of highly luminescent water-soluble CdTe nanorodsElectronic supplementary information (ESI) available: instrumentation, discussion of dipole attraction, XRD pattern of CdTe nanorods and TEM image of CdTe nanowires. See http://www.rsc.org/suppdata/cc/b4/b405623j/
Source: Royal Society of Chemistry journal article supplement (doi:10.1039/b405623j), 2004-01-01
Supplement: b405623j.doc [file b405623j.doc]

**Instruments**

TEM images were recorded by a JEOL-2010 electron microscope operating at 200 kV. Samples for TEM were prepared by casting one drop of the CdTe sample solution onto a standard carbon-coated (200-300 Å) formvar film on copper grid (230 meshes).

Fluorescence spectra data were obtained from FS920 steady state fluorescence spectrometer (Edinburgh Instrumentes, Britain). The excitation wavelength is 400 nm.

Power X-ray diffraction (XRD) measurement was performed on Rigaku D/max-IIB X-ray Diffractometer using Cu K radiation (1.5406 Å) of 40 kV and 20 mA.

**Figures**

**Fig. S1** XRD pattern of CdTe nanorods showing that the nanorods have a cubic CdTe crystal structure.


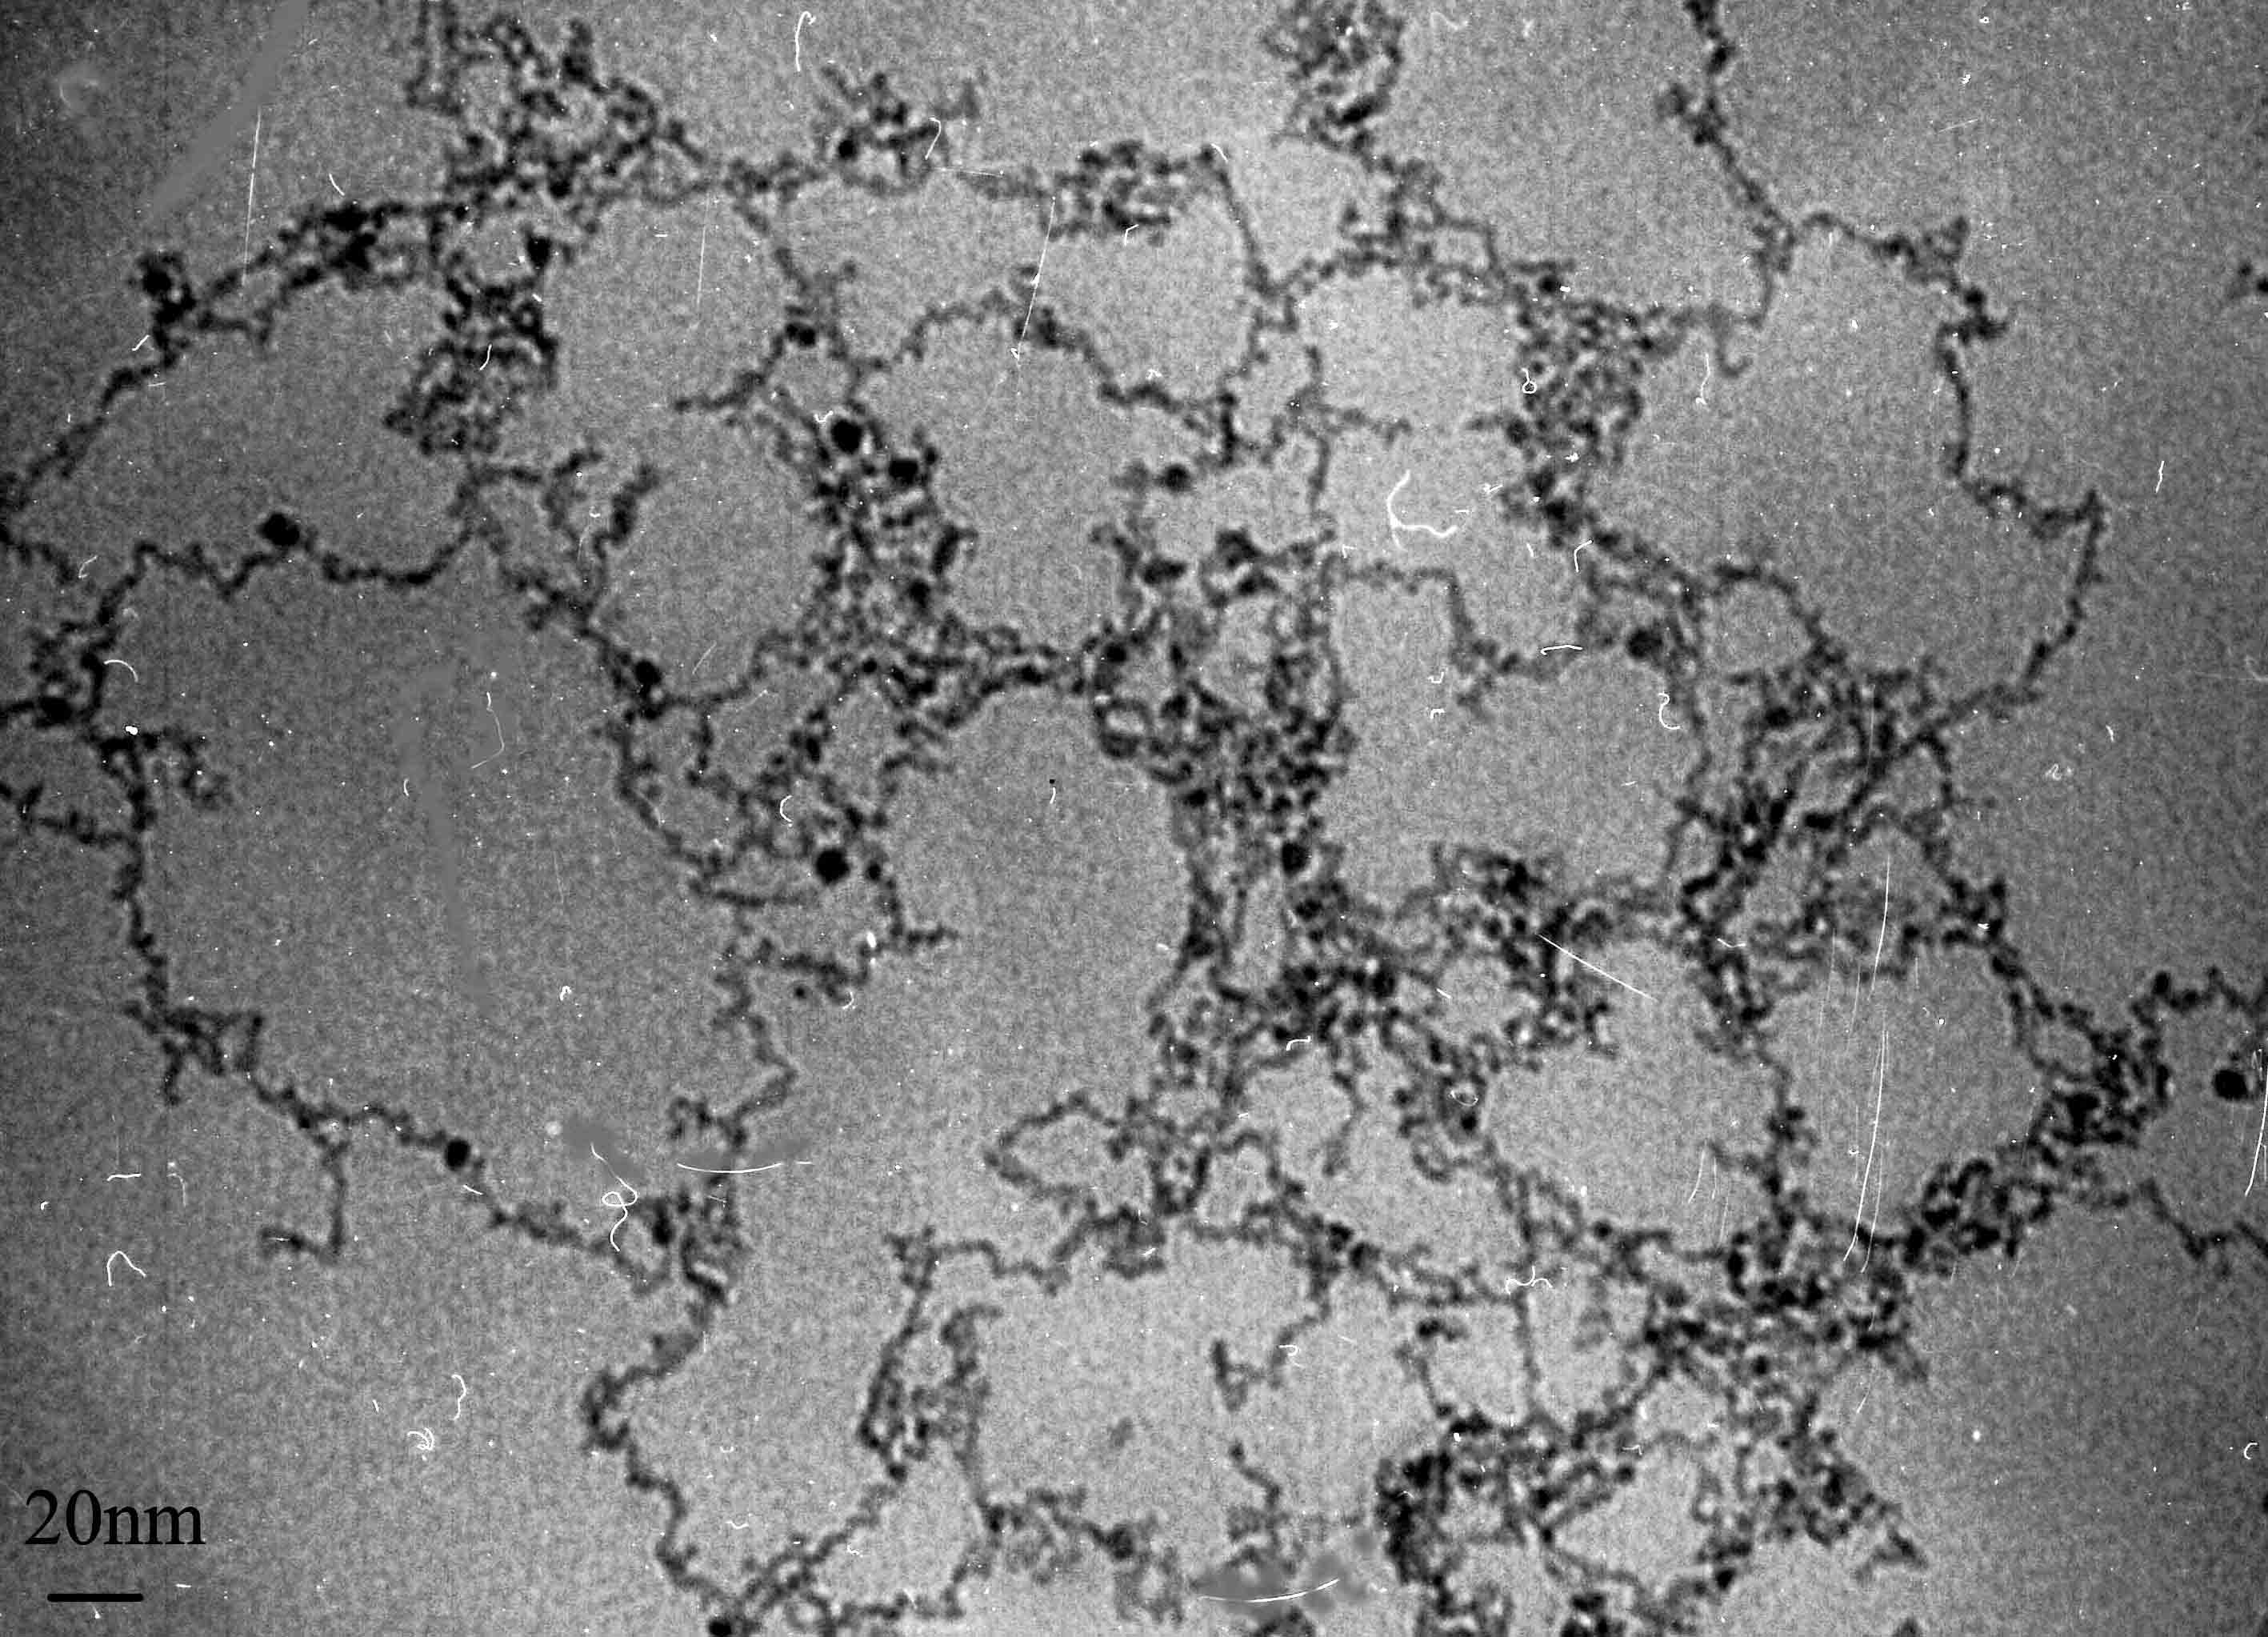


**Fig. S2** TEM image of CdTe nanowires. The CdTe QDs were found to be spontaneously reorganized into crystalline nanowires upon controlled removal of the TGA ligands.

**Energy of dipole attraction**

The energy of dipole attraction between nanoparticles can be calculated with the classical formula:

E＝－μ2/2πε0r(r2-dNP2).

The distance between nanoparticles, r, is an important parameter for the energy of dipole attraction, which enables the growth of nanorods.
